# Supplementary material for: Bone Healing of Critical-Sized Femoral Defects in Rats Treated with Erythropoietin Alone or in Combination with Xenograft
Source: MDPI journal article supplement (doi:10.3390/vetsci10030196), 2023-03-05
Supplement: s1 [file s1]

**Table S1.** Scoring system for evaluation of the fracture healing of bone de-fects on radiographs.

| Criterion                                                                             | Score |
|---------------------------------------------------------------------------------------|-------|
| 1. Bone formation                                                                     |       |
| No evidence of bone formation                                                         | 1     |
| Bone formation occupying 25% of defect                                                | 2     |
| Bone formation occupying 50% of defect                                                | 3     |
| Bone formation occupying 75% of defect                                                | 4     |
| 2. Total radiographic union                                                           |       |
| Nonunion                                                                              | 1     |
| Possible union                                                                        | 2     |
| Radiographic union                                                                    | 3     |
| 3. Proximal osteotomy union                                                           |       |
| Nonunion                                                                              | 1     |
| Mild bridge (<50%)                                                                    | 2     |
| Moderate bridge (>50%)                                                                | 3     |
| Union                                                                                 | 4     |
| 4. Distal osteotomy union                                                             |       |
| Nonunion                                                                              | 1     |
| Mild bridge (<50%)                                                                    | 2     |
| Moderate bridge (>50%)                                                                | 3     |
| Union                                                                                 | 4     |
| 5. Bridging                                                                           |       |
| No bridging                                                                           | 1     |
| <50% bridged                                                                          | 2     |
| >50% bridged                                                                          | 3     |
| Fully bridged                                                                         | 4     |
| Normal cortical morphology                                                            | 5     |
| 6. Fracture lines                                                                     |       |
| Fracture line from 1.0 to 5.0 mm without bone proliferation                           | 1     |
| Fracture line from 1.0 to 5.0 mm, with bone proliferation, without bridging callus    | 2     |
| Fracture line from 1.0 to 5.0 mm, with bone proliferation and bridging callus         | 3     |
| Fracture line <1.0 mm, without bone proliferation                                     | 4     |
| Fracture line <1.0 mm, with bone proliferation, without bridging callus               | 5     |
| Fracture line <1.0 mm, with bone proliferation and bridging callus (clinical healing) | 6     |
| Absence of fracture line                                                              | 7     |
| 7. Resorption of the implant                                                          |       |
| No evidence of resorption                                                             | 1     |
| Mild resorption                                                                       | 2     |
| Full                                                                                  | 3     |
| 8. Graft-host bone junction                                                           |       |
| No connection                                                                         | 1     |
| Cortex to trabecula                                                                   | 2     |
| Cortex to cortex (one side)                                                           | 3     |
| Cortex to cortex (both sides)                                                         | 4     |
| 9. Remodeling                                                                         |       |
| No remodeling                                                                         | 1     |
| Remodeling of the intramedullary channel                                              | 2     |
| Full                                                                                  | 3     |
